# Supplementary material for: A triangular [Mn3] cluster-based ferrimagnet with significant magnetic entropy change
Source: Royal Society of Chemistry journal article supplement (doi:10.1039/c4tc02958e), 2015-01-01
Supplement: c4tc02958e1.pdf [file c4tc02958e1.pdf]

## Electronic Supporting Information(ESI)

### A triangle [Mn<sub>3</sub>] cluster-based ferrimagnet with significant magnetic entropy change

Huan-Cheng Hu, Chun-Shuai Cao, Yang Yang, Peng Cheng, Bin Zhao\*

**Table S1** Summary of the reported molecule-based magnetic coolants for  $T_{\max} > 3.0$  K

| Compounds                                                                                                                                                    | $T_{\max}$<br>(K) | $-\Delta S_m$<br>(J kg <sup>-1</sup> K <sup>-1</sup> ) | $\Delta H$<br>(T) | Ref. |
|--------------------------------------------------------------------------------------------------------------------------------------------------------------|-------------------|--------------------------------------------------------|-------------------|------|
| Gd <sub>4</sub> Ni <sub>4</sub>                                                                                                                              | 3.5               | 19.0                                                   | 7                 | 1    |
| Gd <sub>4</sub> Ni <sub>8</sub>                                                                                                                              | 3.6               | 22                                                     | 7                 | 2    |
| Gd <sub>24</sub> Co <sub>16</sub>                                                                                                                            | 3.8               | 26.0                                                   | 7                 | 3    |
| Gd <sub>6</sub> Co <sub>4</sub>                                                                                                                              | 4                 | 22.3                                                   | 7                 | 4    |
| Gd <sub>5</sub> Ni <sub>12</sub>                                                                                                                             | 4                 | 21.8                                                   | 7                 | 5    |
| Gd <sub>8</sub> Co <sub>8</sub>                                                                                                                              | 4                 | 20.4                                                   | 7                 | 4    |
| Gd <sub>4</sub> Co <sub>8</sub>                                                                                                                              | 4                 | 19.9                                                   | 7                 | 4    |
| Mn <sub>4</sub>                                                                                                                                              | 4                 | 19.34                                                  | 5                 | 6    |
| Gd <sub>4</sub> Mn <sup>III</sup> <sub>4</sub>                                                                                                               | 4                 | 19.0                                                   | 7                 | 7    |
| GdNi <sub>2</sub>                                                                                                                                            | 4                 | 13.74                                                  | 7                 | 8    |
| Co <sub>5</sub>                                                                                                                                              | 4                 | 13.23                                                  | 8                 | 9    |
| Dy <sub>5</sub> Zn                                                                                                                                           | 4                 | 10.82                                                  | 7                 | 10   |
| Gd <sub>2</sub> Cr <sub>2</sub>                                                                                                                              | 4.1               | 11.4                                                   | 9                 | 11   |
| Mn <sup>III</sup> <sub>12</sub> Mn <sup>II</sup> <sub>7-1</sub>                                                                                              | 4.2               | 8.9                                                    | 7                 | 12   |
| Gd <sub>2</sub> Ni <sub>2</sub>                                                                                                                              | 4.5               | 34.4                                                   | 7                 | 13   |
| Cu <sub>12</sub> Gd <sub>6</sub>                                                                                                                             | 4.5               | 14.0                                                   | 7                 | 14   |
| TbNi <sub>3</sub>                                                                                                                                            | 4.5               | 13.54                                                  | 7                 | 15   |
| YNi <sub>3</sub>                                                                                                                                             | 4.5               | 10.83                                                  | 7                 | 15   |
| [Gd <sub>2</sub> (fum) <sub>3</sub> (H <sub>2</sub> O) <sub>4</sub> ] <sub>n</sub> ·3nH <sub>2</sub> O                                                       | 5                 | 20.7                                                   | 7.5               | 16   |
| Co <sub>3</sub> Dy                                                                                                                                           | 5                 | 12.58                                                  | 7                 | 17   |
| Mn <sup>III</sup> <sub>11</sub> Mn <sup>II</sup> <sub>6</sub>                                                                                                | 5.2               | 13.3                                                   | 9                 | 12   |
| GdNi <sub>3</sub>                                                                                                                                            | 5.5               | 18.31                                                  | 7                 | 15   |
| Gd <sub>4</sub> Cu <sub>8</sub>                                                                                                                              | 5.6               | 14.6                                                   | 7                 | 2    |
| [Fe <sub>14</sub> (C <sub>2</sub> H <sub>2</sub> N <sub>3</sub> ) <sub>6</sub> O <sub>6</sub> (OMe) <sub>18</sub> Cl <sub>6</sub> ] (T <sub>N</sub> = 3.4 K) | 6                 | 20.3                                                   | 7                 | 18   |
| [Fe <sub>14</sub> (bta) <sub>6</sub> O <sub>6</sub> (OMe) <sub>18</sub> Cl <sub>6</sub> ] (T <sub>N</sub> = 1.87 K)                                          | 6                 | 17.6                                                   | 7                 | 19   |
| Mn <sub>12</sub> Gd <sub>6</sub> -1                                                                                                                          | 6                 | 15.8                                                   | 7                 | 20   |
| Mn <sub>4</sub> Gd <sub>3</sub>                                                                                                                              | 6                 | 7.4                                                    | 5                 | 21   |
| Mn <sub>4</sub> Dy <sub>3</sub>                                                                                                                              | 6                 | 3.7                                                    | 5                 | 21   |
| Mn <sub>12</sub> (T <sub>B</sub> =3.0 K)                                                                                                                     | 6.5               | 12.5                                                   | 3                 | 22   |
| Mn <sub>12</sub> Gd <sub>6</sub> -2                                                                                                                          | 7                 | 17.0                                                   | 7                 | 20   |
| Fe <sub>14</sub> (bta) <sub>2</sub> -Au                                                                                                                      | 7                 | 13.0                                                   | 6                 | 23   |

|                                                                                                                                                                                   |      |       |   |    |
|-----------------------------------------------------------------------------------------------------------------------------------------------------------------------------------|------|-------|---|----|
| Mn <sup>III</sup> <sub>12</sub> Mn <sup>II</sup> <sub>7-2</sub>                                                                                                                   | 7    | 9.0   | 7 | 24 |
| [Mn(glc) <sub>2</sub> ] <sub>n</sub>                                                                                                                                              | ≈7   | 6.9   | 7 | 25 |
| DyNi <sub>3</sub>                                                                                                                                                                 | 7.5  | ≈12.2 | 7 | 15 |
| HoNi <sub>3</sub>                                                                                                                                                                 | 7.5  | ≈11.5 | 7 | 15 |
| Mn <sup>III</sup> <sub>11</sub> Mn <sup>II</sup> <sub>4</sub>                                                                                                                     | 10   | 9.5   | 7 | 24 |
| Co <sub>4</sub> (SMR+LRO)                                                                                                                                                         | ≈10  | 2.4   | 5 | 26 |
| [Fe(pyrazole) <sub>4</sub> ] <sub>2</sub> [Nb(CN) <sub>8</sub> ]·4H <sub>2</sub> O <sub>n</sub> (Ferrimagnet)                                                                     | 10.3 | 4.8   | 5 | 27 |
| [Na <sub>2</sub> Mn <sub>3</sub> (SO <sub>4</sub> ) <sub>3</sub> (μ <sub>3</sub> -OH) <sub>2</sub> (μ <sub>2</sub> -OH <sub>2</sub> ) <sub>2</sub> ] <sub>n</sub> (this work)     | 13.5 | 14.4  | 7 |    |
| Mn <sub>3</sub> (OH) <sub>2</sub> (C <sub>6</sub> H <sub>2</sub> O <sub>4</sub> S) <sub>2</sub> (T <sub>N</sub> = 17.7 K)                                                         | ≈23  | ≈1.5  | 5 | 28 |
| [Mn <sup>II</sup> (pydz)(H <sub>2</sub> O) <sub>2</sub> ][Mn <sup>II</sup> (H <sub>2</sub> O) <sub>2</sub> ][Nb <sup>IV</sup> (CN) <sub>8</sub> ]·3H <sub>2</sub> O (Ferrimagnet) | 43   | 8.95  | 5 | 29 |
| [Mn <sup>II</sup> (pydz)(H <sub>2</sub> O) <sub>2</sub> ][Mn <sup>II</sup> (H <sub>2</sub> O) <sub>2</sub> ][Nb <sup>IV</sup> (CN) <sub>8</sub> ]·3H <sub>2</sub> O (p=1.19 GPa)  | 52.5 | 4.63  | 5 | 29 |
| NiCr <sub>2/3</sub> (Ferromagnet order)                                                                                                                                           | 68   | 6.6   | 7 | 30 |
| CsNi <sup>III</sup> [Cr <sup>III</sup> (CN) <sub>6</sub> ]·H <sub>2</sub> O (Ferromagnetic order)                                                                                 | ≈90  | 6.6   | 7 | 31 |
| CsNiCr (Ferromagnet order)                                                                                                                                                        | 95   | 6.9   | 7 | 30 |
| Cr <sub>3</sub> <sup>III</sup> [Cr <sup>III</sup> (CN) <sub>6</sub> ] <sub>2</sub> ·12H <sub>2</sub> O (Ferrimagnet order)                                                        | ≈230 | 0.93  | 7 | 31 |

Note: T<sub>N</sub>: Antiferromagnetic temperature; T<sub>B</sub>: Block temperature; SMR: Slow magnetic relaxation; LRO: Long-range Order.

**Table S2** Crystal data and structure refinement for **1**

|                                                                                                                                       |                                                                               |
|---------------------------------------------------------------------------------------------------------------------------------------|-------------------------------------------------------------------------------|
| Empirical formula                                                                                                                     | Na <sub>2</sub> Mn <sub>3</sub> S <sub>3</sub> O <sub>16</sub> H <sub>6</sub> |
| Crystal system                                                                                                                        | orthorhombic                                                                  |
| Space group                                                                                                                           | Cmc2 <sub>1</sub>                                                             |
| a/Å                                                                                                                                   | 18.0718(6)                                                                    |
| b/Å                                                                                                                                   | 7.8465(3)                                                                     |
| c/Å                                                                                                                                   | 9.9048(3)                                                                     |
| α/°                                                                                                                                   | 90.00                                                                         |
| β/°                                                                                                                                   | 90.00                                                                         |
| γ/°                                                                                                                                   | 90.00                                                                         |
| Volume / Å <sup>3</sup>                                                                                                               | 1404.51(9)                                                                    |
| Z                                                                                                                                     | 8                                                                             |
| ρ <sub>calc</sub> mg/mm <sup>3</sup>                                                                                                  | 2.681                                                                         |
| m/mm-1                                                                                                                                | 3.250                                                                         |
| F(000)                                                                                                                                | 1108.0                                                                        |
| Radiation                                                                                                                             | Mo Kα (λ = 0.71073)                                                           |
| 2θ range for data collection                                                                                                          | 7 to 52°                                                                      |
| Index ranges                                                                                                                          | -19 ≤ h ≤ 22, -5 ≤ k ≤ 9, -11 ≤ l ≤ 12                                        |
| Reflections collected                                                                                                                 | 1784                                                                          |
| Independent reflections                                                                                                               | 1193 [R <sub>int</sub> = 0.0280, R <sub>sigma</sub> = 0.0487]                 |
| Goodness-of-fit on F <sup>2</sup>                                                                                                     | 1.081                                                                         |
| Final R indexes [I ≥ 2σ (I)]                                                                                                          | R <sub>1</sub> = 0.0334, wR <sub>2</sub> = 0.0841                             |
| Final R indexes [all data]                                                                                                            | R <sub>1</sub> = 0.0348, wR <sub>2</sub> = 0.0858                             |
| ${}^a R_1 = \frac{\sum   F_o  -  F_c  }{\sum  F_o } \quad {}^b wR_2 = \left[ \frac{\sum w(F_o^2 - F_c^2)}{\sum wF_o^4} \right]^{1/2}$ |                                                                               |

**Table S3.** Some selected bond lengths (Å) and angles (degree) for compound **1**

|              |          |                     |            |                     |            |
|--------------|----------|---------------------|------------|---------------------|------------|
| Mn(1)-O(2)#2 | 2.170(4) | O(2)#1-Mn(1)-O(9)   | 87.41(18)  | O(3)#4-Mn(2)-O(4)   | 84.17(13)  |
| Mn(1)-O(6)   | 2.115(4) | O(5)-Mn(1)-O(8)#3   | 81.18(16)  | O(4)-Mn(2)-O(1)#5   | 89.42(14)  |
| Mn(1)-O(8)#3 | 2.168(4) | O(5)-Mn(1)-O(9)     | 95.1(2)    | O(5)-Mn(2)-O(4)     | 91.11(14)  |
| Mn(1)-O(9)   | 2.182(5) | O(5)-Mn(1)-O(10)    | 88.4(19)   | O(5)-Mn(2)-O(8)     | 83.8(2)    |
| Mn(1)-O(10)  | 2.203(5) | O(6)-Mn(1)-O(8)#3   | 167.2(2)   | O(5)-Mn(2)-O(3)#4   | 106.6(2)   |
| Mn(1)-O(5)   | 2.163(4) | O(6)-Mn(1)-O(9)     | 83.25(19)  | O(8)-Mn(2)-O(1)#5   | 90.9(2)    |
| Mn(2)-O(1)#4 | 2.231(7) | O(6)-Mn(1)-O(10)    | 92.88(18)  | O(8)-Mn(2)-O(3)#4   | 169.6(2)   |
| Mn(2)-O(3)#5 | 2.185(6) | O(6)-Mn(1)-O(5)     | 92.99(18)  | O(8)-Mn(2)-O(4)     | 95.84(12)  |
| Mn(2)-O(4)   | 2.188(4) | O(8)#3-Mn(1)-O(2)#1 | 98.65(17)  | Mn(1)-O(10)-Na(1)#9 | 119.49(18) |
| Mn(2)-O(8)   | 2.175(6) | O(8)#3-Mn(1)-O(9)   | 85.9(2)    | Mn(1)-O(6)-Na(1)    | 104.25(17) |
| Mn(2)#8-O(3) | 2.185(6) | O(8)#3-Mn(1)-O(10)  | 98.3(2)    | Mn(1)-O(5)-Mn(1)#2  | 96.3(2)    |
| Mn(2)-O(5)   | 2.142(5) | O(9)-Mn(1)-O(10)    | 174.95(18) | Mn(1)#5-O(8)-Mn(2)  | 119.8(2)   |
| Mn(2)#3-O(1) | 2.231(7) | O(3)#4-Mn(2)-O(1)#5 | 78.7(2)    | Mn(2)-O(5)-Mn(1)    | 128.36(14) |

Symmetry transformations used to generate equivalent atoms for bond length: #2 +X, 1-Y, 1/2+Z; #3 -X, 1-Y, 1/2+Z; #4 -X, 1-Y, -1/2+Z; #5 +X, -1+Y, +Z; #6 1/2-X, 1/2+Y, +Z; #8 +X, 1+Y, +Z; Symmetry transformations used to generate equivalent atoms for bond angles: #1 +X, 1-Y, 1/2+Z; #2 -X, +Y, +Z; #3 -X, 1-Y, 1/2+Z; #4 +X, -1+Y, +Z; #5 -X, 1-Y, -1/2+Z; #7 +X, 1-Y, -1/2+Z; #9 1/2-X, -1/2+Y, +Z

**Table S4.** Geometrical parameters of strong hydrogen bonds for compound **1**

| Donor --- H...Acceptor | D - H | H...A | D...A  | D - H...A |
|------------------------|-------|-------|--------|-----------|
| O(10) --H(10A) ..O(7)  | 0.84  | 1.94  | 2.7414 | 161       |
| O(10) --H(10B) ..O(3)  | 0.84  | 2.25  | 3.0250 | 154       |

**Table S5.** The determination of oxidation state for Mn in **1**<sup>32</sup>

|         | Bond length | Bond valences(s) |         | Bond length | Bond valences(s) |
|---------|-------------|------------------|---------|-------------|------------------|
| Mn1-O2  | 2.17        | 0.33468          | Mn2-O1  | 2.231       | 0.28381          |
| Mn1-O5  | 2.163       | 0.34107          | Mn2-O3  | 2.185       | 0.32138          |
| Mn1-O6  | 2.115       | 0.38831          | Mn2-O4  | 2.188       | 0.31878          |
| Mn1-O8  | 2.168       | 0.33649          | Mn2-O4A | 2.188       | 0.31878          |
| Mn1-O9  | 2.182       | 0.324            | Mn2-O5  | 2.142       | 0.36098          |
| Mn1-O10 | 2.203       | 0.30612          | Mn2-O8  | 2.175       | 0.33018          |

Thorpe pointed out that the oxidation state of metal ions could be given via the bond valence sum. Bond valence  $s = \exp[(r_0 - r)/B]$ , where  $B = 0.37$ ,  $r_0$  values base on crystallographically characterized model complexes,  $r$  represents the metal-ligand bond lengths, namely, the bond distances of Mn-O in our work, and then 2.03 and 1.93 are gained for Mn1 and Mn2, respectively, indicating the oxidation state of Mn is +2.

## Thermogravimetric Analysis (TGA)

To confirm the thermal stability of coordination polymer **1**, thermogravimetric analysis (TGA) has been measured. The result indicates that this compound exhibits high thermal stability. The framework is stable up to about 240 °C, which is indicative of no solvent molecules and strong hydrogen bonded interactions existing in **1**. Further heating, the framework starts to collapse due to the appearance of a gradual weight loss.

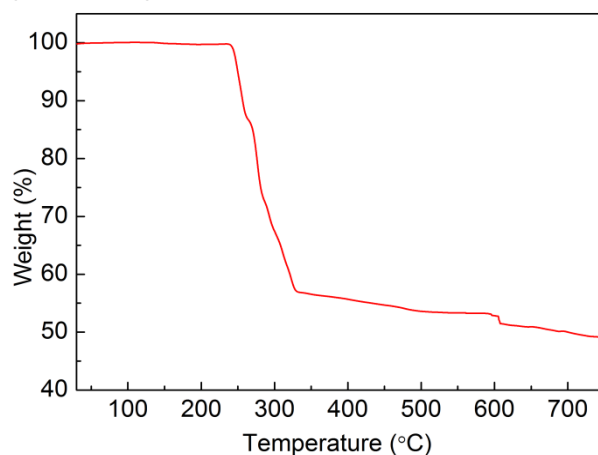

**Fig. S1** The thermogravimetric analysis curve for coordination polymer **1**.

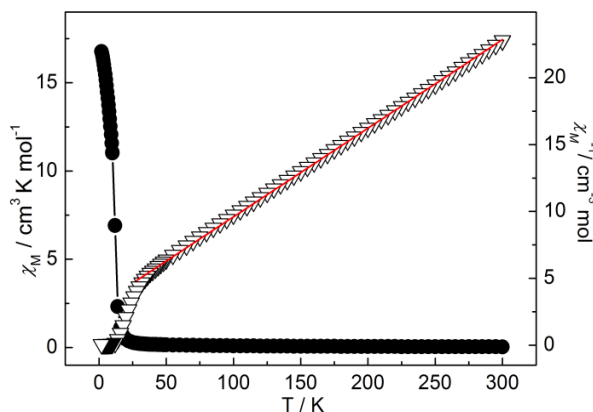

**Fig. S2** The plots of  $\chi_M$  vs.  $T$  and  $\chi_M^{-1}$  vs.  $T$  for **1** at  $H=1000$  Oe from 2 to 300K. The solid line is the best fit according to the Curie-Weiss law (28-300 K).

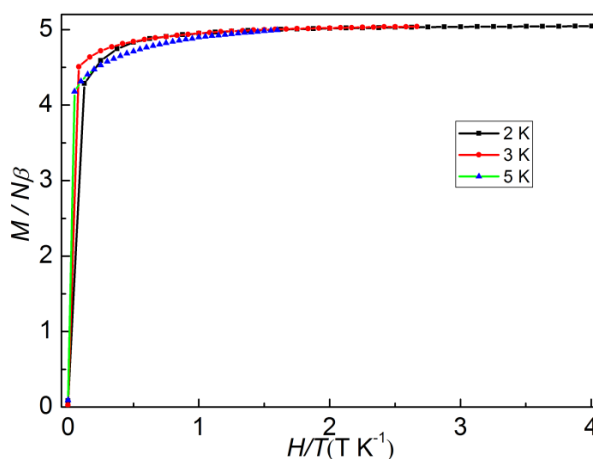

Fig. S3  $M$  vs.  $H/T$  curves under the temperatures of 2, 3 and 5 K for **1**

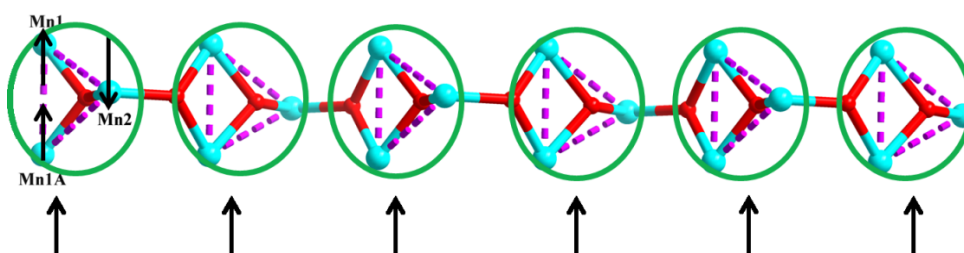

Fig. S4 The spin sketch map of magnetic interaction for per  $[Mn_3]$  cluster and the corresponding chain.

The simulation of magnetic data were carried out based on the Lippard's work (*J. Am. Chem. Soc.*, 1987, **109**, 4244), in which one equicrural triangular  $[M_3]$  model when each M ion has  $s = 5/2$  (high-spin), and the  $\chi_M$  is expressed as depicted  $\chi_M = (Ng^2\beta^2/4kT)*(F/G)$ ,<sup>33</sup>

where  $F = F_2 + F_3 + 10*(A^3)*(F_6 - F_5) + 35*(A^8)*(1 + F_6) + 84*(A^{15}) * F_6 + 165*(A^{24}) * (F_6 - F_1) + 286*(A^{35}) * (F_3 + F_4 + F_5) + 455*(A^{48}) * (F_4 + F_5) + 680*(A^{63}) * F_5$

$G = F_2 + F_3 + 2*(A^3)*(F_6 - F_5) + 3*(A^8)*(1 + F_6) + 4*(A^{15}) * F_6 + 5*(A^{24}) * (F_6 - F_1) + 6*(A^{35}) * (F_3 + F_4 + F_5) + 7*(A^{48}) * (F_4 + F_5) + 8*(A^{63}) * F_5$

$A = \exp(P_2/(0.695*T))$

$B = \exp((P_1 - P_2)/(0.695*T))$

$F_1 = B^2$

$F_2 = B^6$

$F_3 = B^{12}$

$F_4 = B^{20}$

$F_5 = B^{30}$

$F_6 = F_1 + F_2 + F_3 + F_4 + F_5$

$\chi_M = 0.09375*(P_3^2)*F/(G*T)$

With the introduction of an intercluster interaction  $zJ'$ ,  $\chi_M$  is expressed as shown

$\chi_M = \chi_M / (1 - 2*P_4*\chi_M / (0.26*(P_3^2)))$ , and  $\chi_M T = T*\chi_M / (1 - 2*P_4*\chi_M / (0.26*(P_3^2)))$

$P_1$  and  $P_2$  refer to the  $J_1$  (the Mn1...Mn1A interaction) and  $J_2$  (the interactions between Mn1...Mn2 and Mn1A...Mn2),  $P_3$  refers to  $g$ -factor,  $P_4$  refers to  $zJ'$  (the intercluster exchange interaction).

## References

1. T. D. Pasatoiu, A. Ghirri, A. M. Madalan, M. Affronte and M. Andruh, *Dalton Trans.* 2014, **43**, 9136.
2. T. N. Hooper, J. Schnack, S. Piligkos, M. Evangelisti and E. K. Brechin, *Angew. Chem. Int. Ed.*, 2012, **51**, 4633.
3. Z.-M. Zhang, L.-Y. Pan, W.-Q. Lin, J.-D. Leng, F.-S. Guo, Y.-C. Chen, J.-L. Liu and M.-L. Tong, *Chem. Commun.*, 2013, **49**, 8081.
4. Y.-Z. Zheng, M. Evangelisti and R. E. P. Winpenny, *Chem. Sci.*, 2011, **2**, 99.
5. Z.-Y. Li, J. Zhu, X.-Q. Wang, J. Ni, J.-J. Zhang, S.-Q. Liu and C.-Y. Duan, *Dalton Trans.*,

- 2013, **42**, 5711.
6. J.-P. Zhao, R. Zhao, Q. Yang, B.-W. Hu, F.-C. Liu and X.-H. Bu, *Dalton Trans.* 2013, **42**, 14509.
  7. G. Karotsis, S. Kennedy, S. J. Teat, C. M. Beavers, D. A. Fowler, J. J. Morales, M. Evangelisti, S. J. Dalgarno and E. K. Brechin, *J. Am. Chem. Soc.*, 2010, **132**, 12983.
  8. A. Upadhyay, N. Komatireddy, A. Ghirri, F. Tuna, S. K. Langley, A. K. Srivastava, E. C. Sañudo, B. Moubaraki, K. S. Murray, E. J. McInnes, M. Affronte and M. Shanmugam, *Dalton Trans.*, 2014, **43**, 259.
  9. C.-B. Tian, Z.-J. Lin and S.-W. Du, *Cryst. Growth. Des.*, 2013, **13**, 3746.
  10. P.-F. Shi, Y.-Z. Zheng, X.-Q. Zhao, G. Xiong, B. Zhao, F.-F. Wan and P. Cheng, *Chem. Eur. J.*, 2012, **18**, 15086.
  11. C. A. Thuesen, K. S. Pedersen, M. Schau-Magnussen, M. Evangelisti, J. Vibenholt, S. Piligkos, H. Weihe and J. Bendix, *Dalton Trans.*, 2012, **41**, 11284.
  12. S. Nayak, M. Evangelisti, A. K. Powell and J. Reedijk, *Chem. Eur. J.*, 2010, **16**, 12865.
  13. P. Wang, S. Shannigrahi, N. L. Yakovlev and T. S. A. Hor, *Chem. Asian J.*, 2013, **8**, 2943.
  14. J.-L. Liu, Y.-C. Chen, Q.-W. Li, S. Gómez-Coca, D. Aravena, E. Ruiz, W.-Q. Lin, J.-D. Leng and M.-L. Tong, *Chem. Commun.*, 2013, **49**, 6549.
  15. P. Wang, S. Shannigrahi, N. L. Yakovlev and T. S. A. Hor, *Dalton Trans.*, 2014, **43**, 182.
  16. L. Sedláková, J. Hanko, A. Orendáčová, M. Orendáč, C.-L. Zhou, W.-H. Zhu, B.-W. Wang, Z.-M. Wang and S. Gao, *J. Alloys Compd.*, 2009, **487**, 425.
  17. P. Wang, S. Shannigrahi, N. L. Yakovlev and T. S. A. Hor, *Inorg. Chem.*, 2012, **51**, 12059.
  18. R. Shaw, R. H. Laye, L. F. Jones, D. M. Low, C. Talbot-Eeckelaers, Q. Wei, C. J. Milios, S. Teat, M. Helliwell, J. Raftery, M. Evangelisti, M. Affronte, D. Collison, E. K. Brechin and E. J. L. McInnes, *Inorg. Chem.*, 2007, **46**, 4968.
  19. (a) D. M. Low, L. F. Jones, A. Bell, E. K. Brechin, T. Mallah, E. Rivière, S. J. Teat and E. J. L. McInnes, *Angew. Chem. Int. Ed.*, 2003, **42**, 3781; (b) M. Evangelisti, A. Candini, A. Ghirri, M. Affronte, E. K. Brechin and E. J. L. McInnes, *Appl. Phys. Lett.*, 2005, **87**, 072504.
  20. J.-L. Liu, W.-Q. Lin, Y.-C. Chen, J.-D. Leng, F.-S. Guo and M.-L. Tong, *Inorg. Chem.*, 2013, **52**, 457.
  21. C.-M. Liu, D.-Q. Zhang and D.-B. Zhu, *Dalton Trans.*, 2010, **39**, 11325.
  22. F. Torres, J. M. Hernández, X. Bohigas and J. Tejada, *Appl. Phys. Lett.*, 2000, **77**, 3248.
  23. V. Corradini, A. Ghirri, A. Candini, R. Biagi, U. del Pennino, G. Dotti, E. Otero, F. Choueikani, R. J. Blagg, E. J. L. McInnes and M. Affronte, *Adv. Mater.*, 2013, **25**, 2816.
  24. J.-L. Liu, J.-D. Leng, Z.-J. Lin and M.-L. Tong, *Chem. Asian J.*, 2011, **6**, 1007.
  25. Y.-C. Chen, F.-S. Guo, J.-L. Liu, J.-D. Leng, P. Vrabel, M. Orendáč, J. Prokleška, V. Sechovský and M.-L. Tong, *Chem. Eur. J.*, 2014, **20**, 3029.
  26. R. Sibille, T. Mazet, B. Malaman, T. Gaudisson and M. François, *Inorg. Chem.*, 2012, **51**, 2885.
  27. R. Pelka, P. Konieczny, P. M. Zieliński, T. Wasiutyński, Y. Miyazaki, A. Inaba, D. Pinkowicz and B. Sieklucka, *J. Magn. Magn. Mater.* 2014, **354**, 359.
  28. R. Sibille, T. Mazet, E. Elkaïm, B. Malaman and M. François, *Inorg. Chem.*, 2013, **52**, 608.
  29. M. Fitta, M. Bałanda, R. Pełka, P. Konieczny, D. Pinkowicz and B. Sieklucka, *J. Phys.: Condens. Matter*, 2013, **25**, 496012.
  30. M. Evangelisti, E. Manuel, M. Affronte, M. Okubo, C. Train and M. Verdager, *J. Magn.*

*Magn. Mater.* 2007, **316**, 569.

31. E. Manuel and M. Evangelisti, *Phys. Rev. B*, 2006, **73**, 172406.
32. W. T. Liu, H. H. Thorp, *Inorg. Chem.*, 1993, **32**, 4102.
33. S. M. Gorun, G. C. Papaefthymiou, R. B. Frankel and S. J. Lippard, *J. Am. Chem. Soc.*, 1987, **109**, 4244.
- 34.
